# Supplementary material for: Size effects and hydrogen storage properties of Mg nanoparticles synthesised by an electroless reduction method
Source: Royal Society of Chemistry journal article supplement (doi:10.1039/c4ta01108b), 2014-01-01
Supplement: c4ta01108b1.pdf [file c4ta01108b1.pdf]

## SUPPLEMENTARY DATA

### Size Effects and Hydrogen Storage Properties of Mg Nanoparticles Synthesised by Electroless Reduction Method

Wei Liu, Kondo-Francois Aguey-Zinsou\*

MERLin group, School of Chemical Engineering, The University of New South Wales,  
Sydney, NSW 2052, Australia

\*Corresponding author: Tel.: +61 (0)2 938 57970; Fax: +61 (0)2 938 55966;  
E-mail address: f.aguey@unsw.edu.au

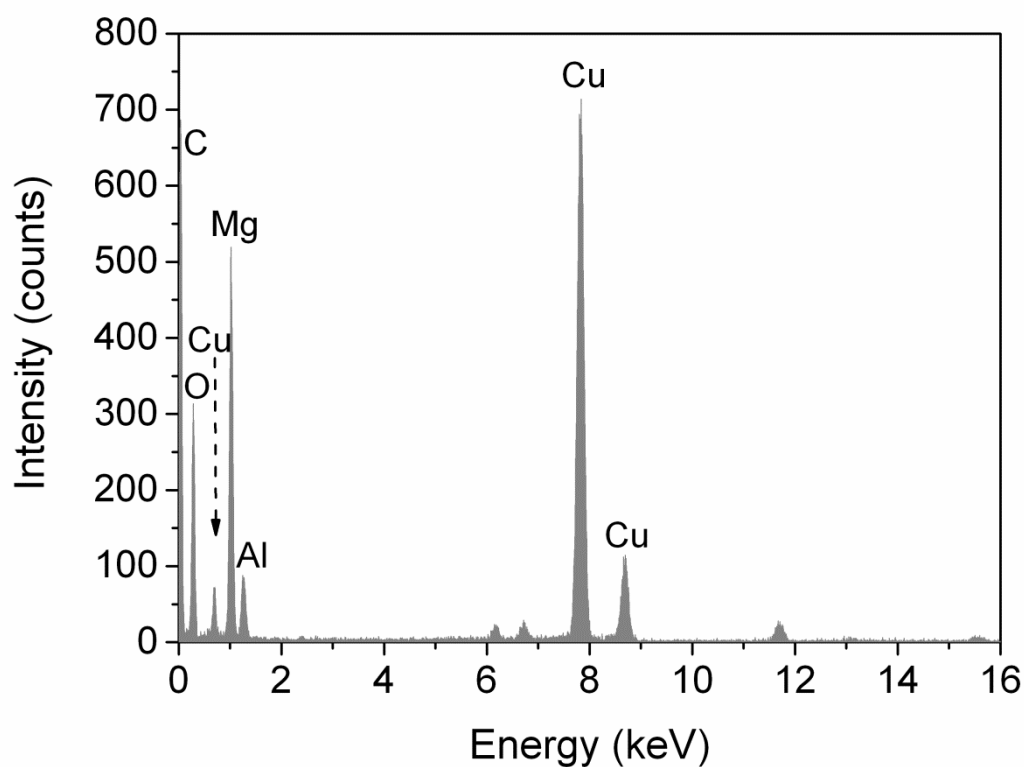

**Fig. S1.** Typical EDS analysis of the as-synthesised Mg nanoparticles observed by TEM

Aluminium is from triethylaluminum which acts as a viscosity reducer in di-*n*-butylmagnesium.

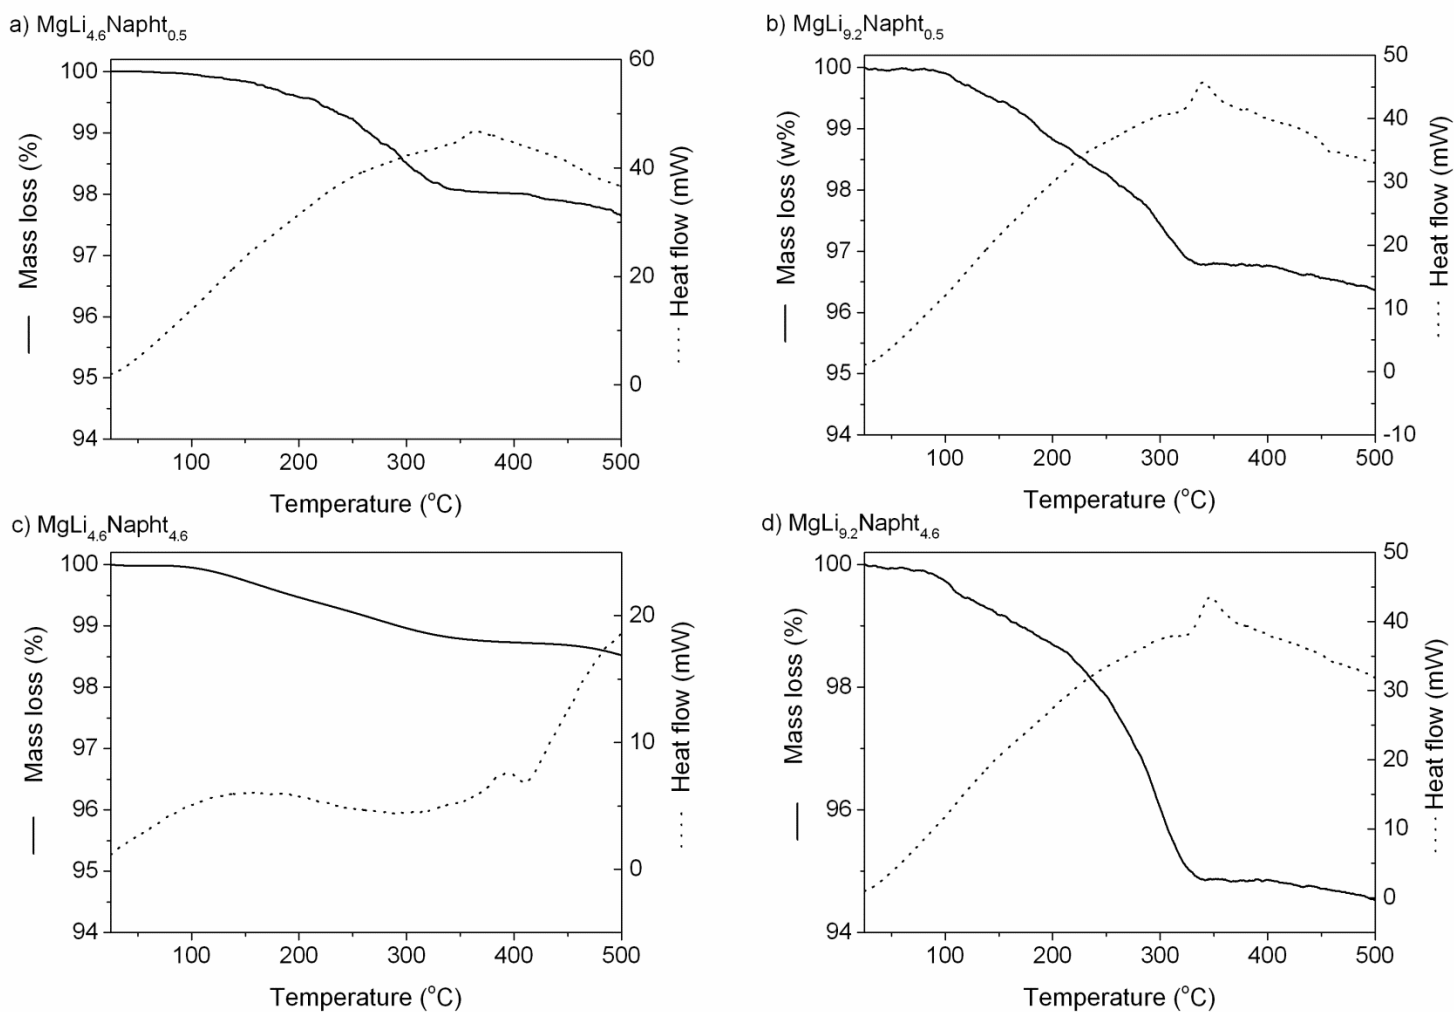

**Fig. S2.** TGA/DSC curves of the as-synthesised materials.

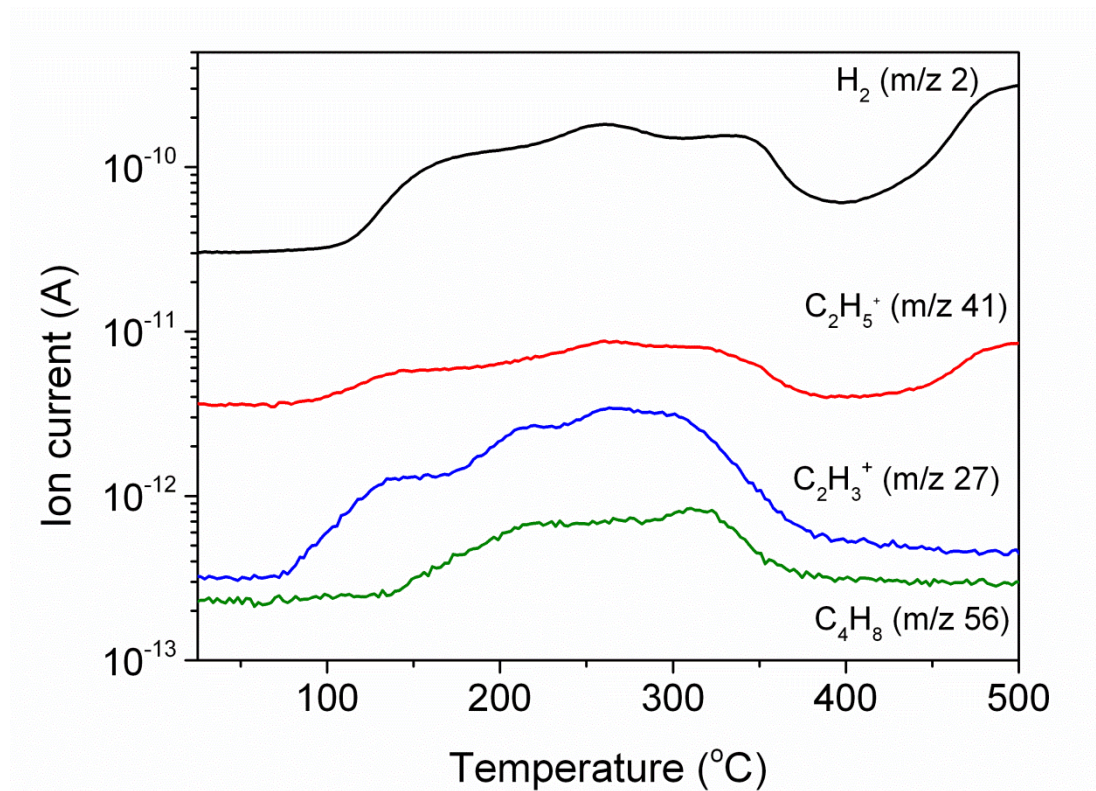

**Fig. S3.** Typical MS for the as-synthesised materials. Case of  $\text{MgLi}_{4.6}\text{Naph}_{0.5}$ .

The decomposition of *n*-butyllithium occurs following the reaction (1) below with the release of butane as detected by MS.

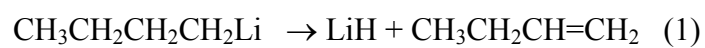

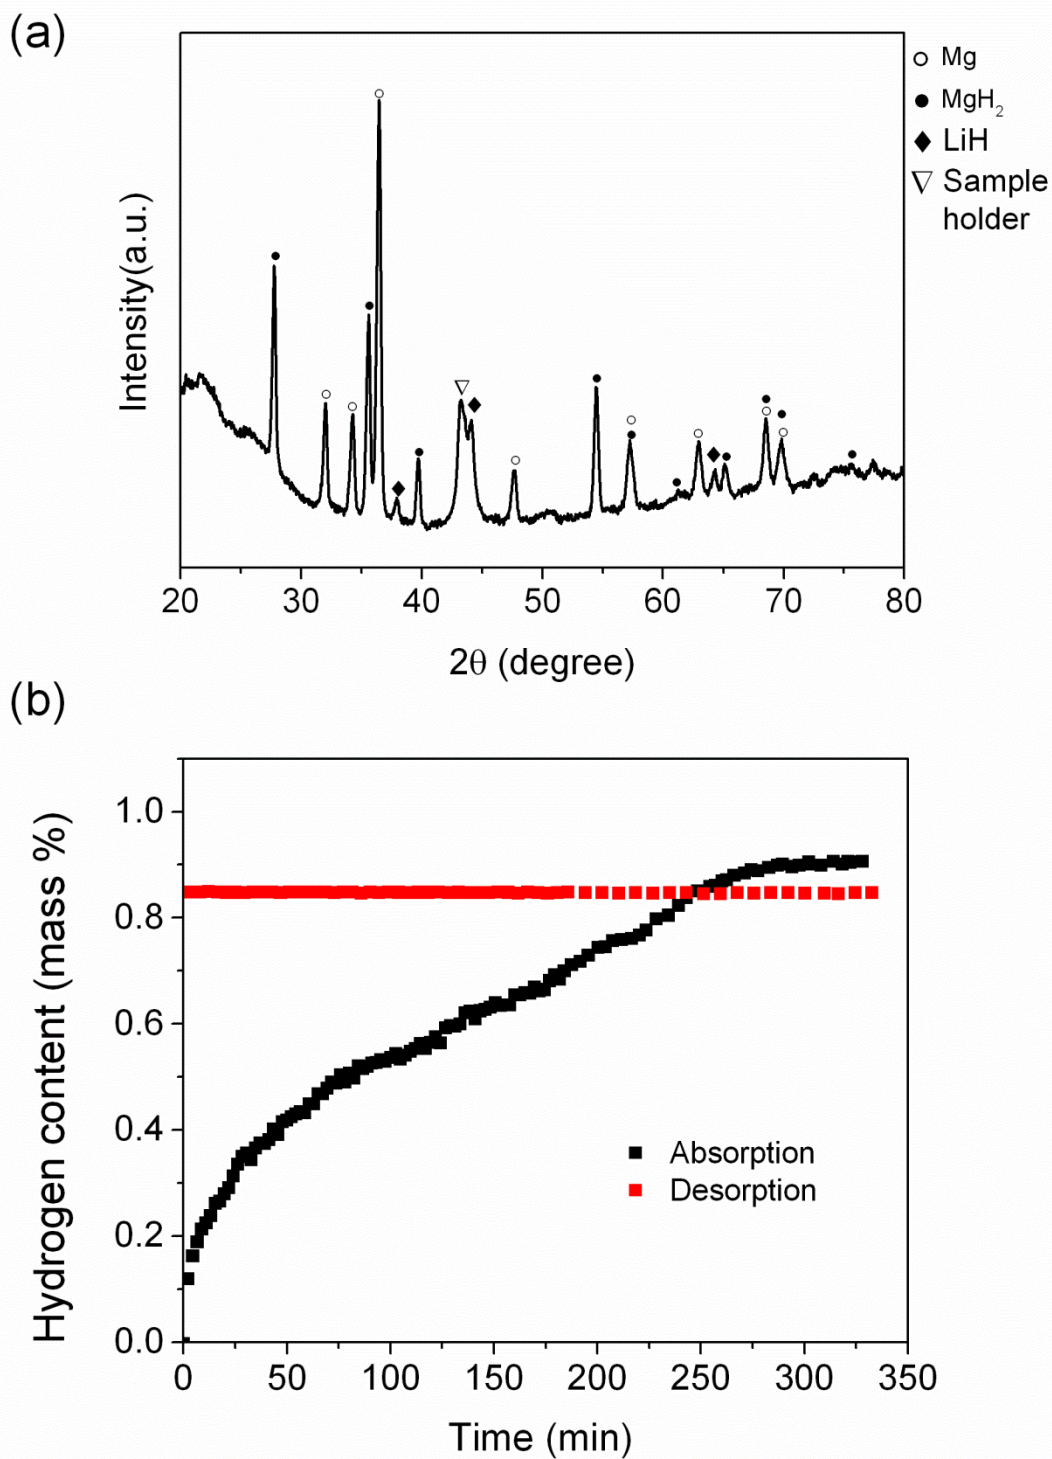

**Fig. S4:** a) XRD profile of  $MgLi_{9.2}Napht_{0.5}$  hydrogenated at 120 °C under 30 bar hydrogen pressure, and b) associated hydrogen sorption kinetics.

The material could absorb hydrogen at 120 °C only. However, no desorption was achieved at this temperature under a pressure of 10 kPa.

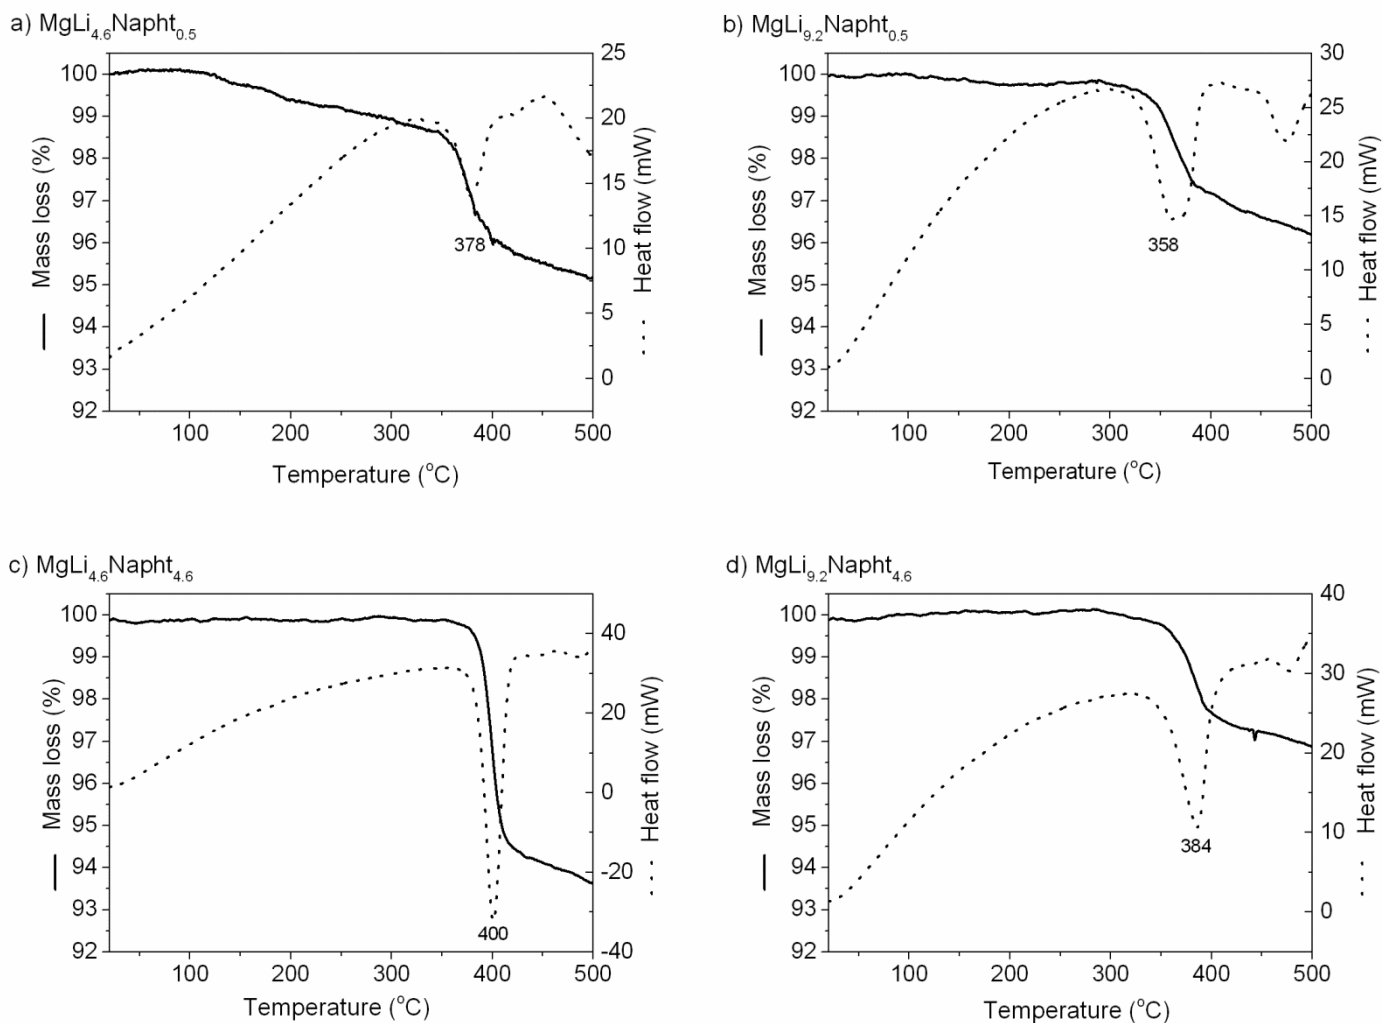

**Fig. S5:** TGA/DSC of the materials after hydrogen absorption at 300 °C.

The mass loss observed correspond to the decomposition of the  $\beta$ - $\text{MgH}_2$  into Mg with hydrogen release. This event is correlated with a strong endothermic peak with a maximum varying from 358 to 384 °C depending on the material. At higher temperatures (> 450 °C), the additional endothermic peak correspond to the decomposition of LiH into Li as proven by the release of hydrogen recorder by MS (Fig. 5).

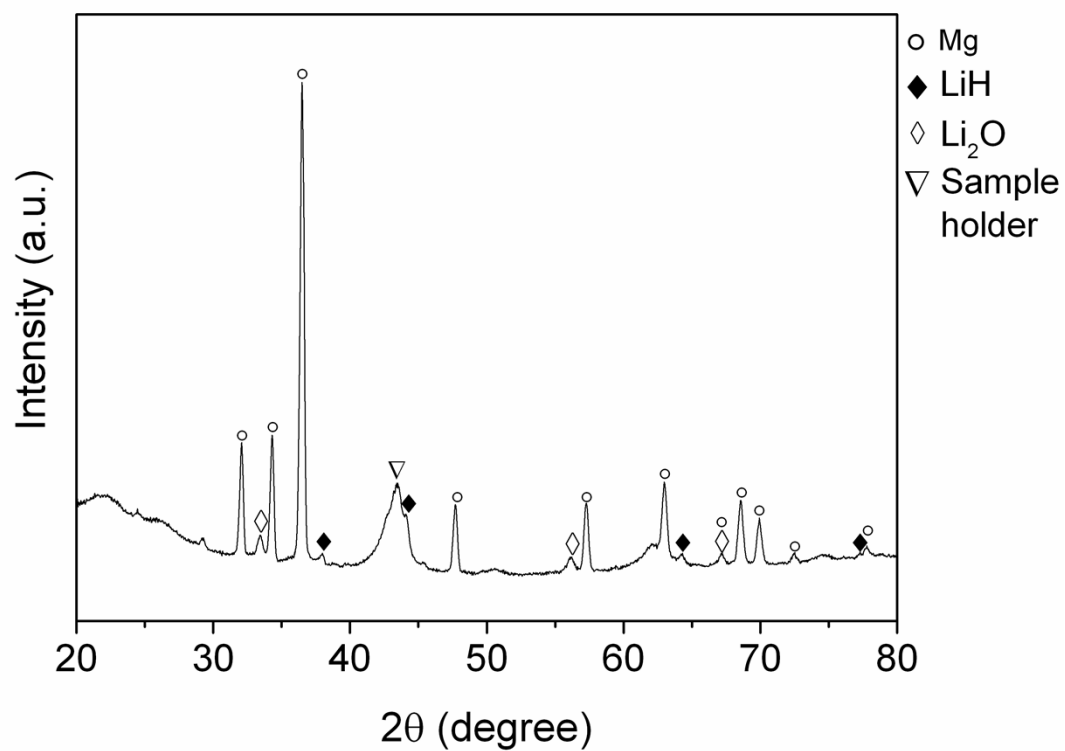

**Fig. S6:** Typical XRD pattern of the materials after hydrogen desorption at 300 °C.

The LiH phase does not decompose at 300 °C in agreement with TGA/MS measurements. The Li<sub>2</sub>O may be due to a partial oxidation of the material during the XRD measurement.

Ball-milled Mg

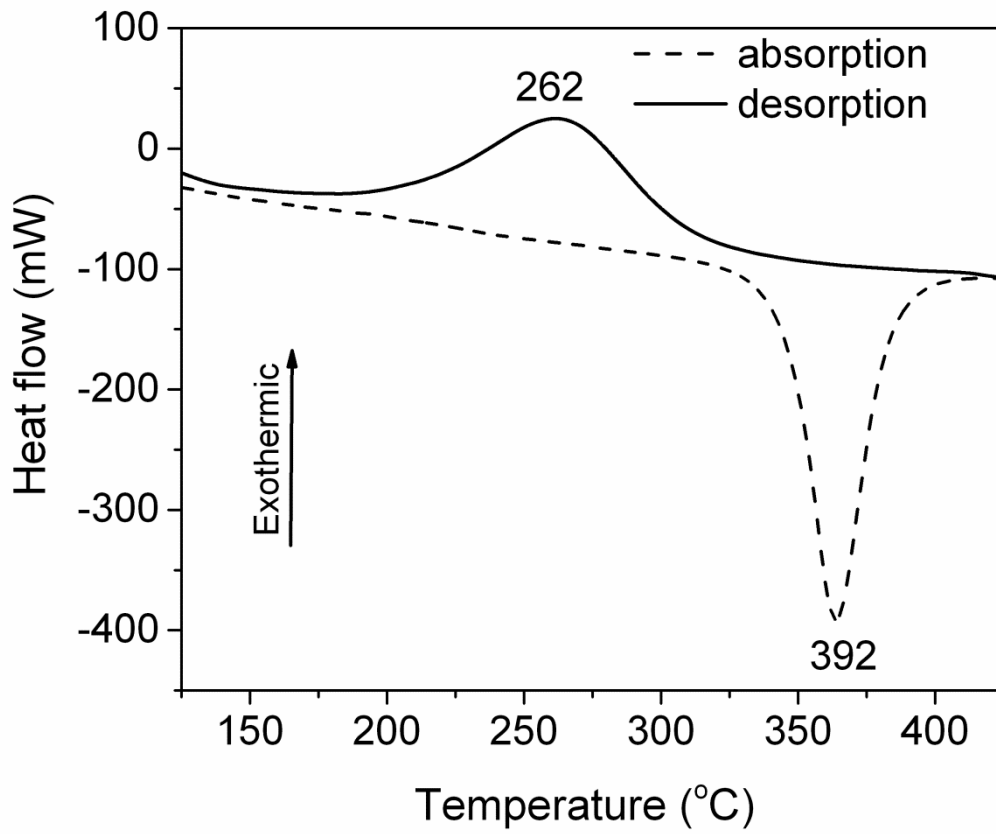

Fig. S7: HP-DSC curves for hydrogen absorption and desorption with ball milled MgH<sub>2</sub>.

Ball-milled Mg (300 °C)

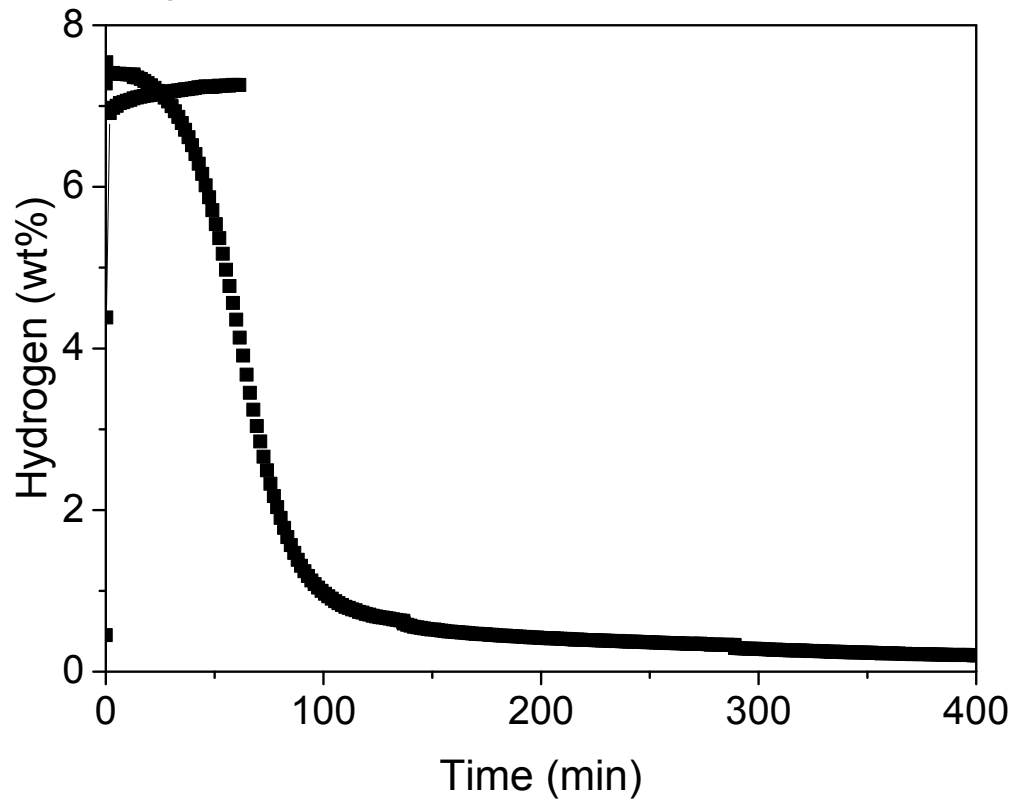

**Fig. S8:** Kinetic curves for hydrogen absorption and desorption with ball-milled MgH<sub>2</sub>.



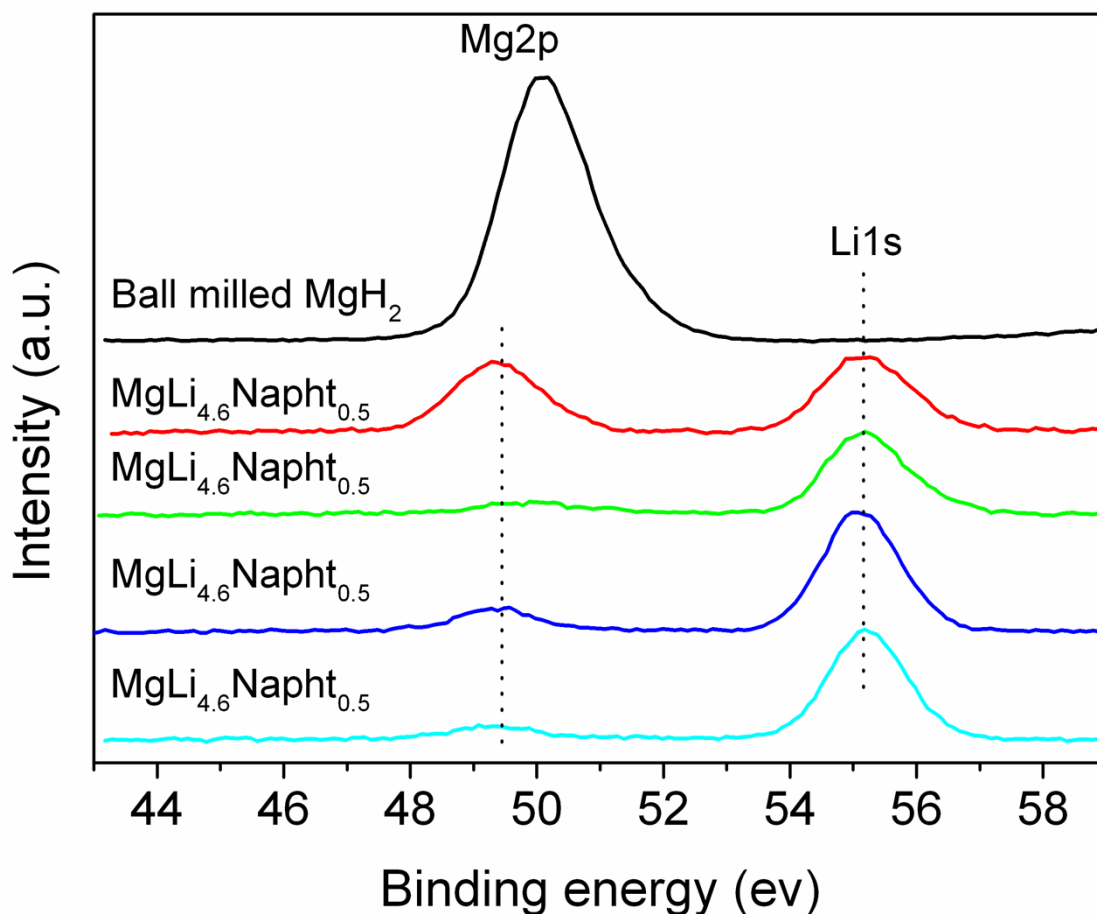

**Fig. S9:** XPS narrow-scan of Mg2p and Li1s for ball-milled MgH<sub>2</sub> and the Mg nanoparticles synthesised after hydrogen cycling.

**Table S1:** Elemental surface composition (atomic percentage, %) as determined by XPS for ball-milled MgH<sub>2</sub> and the Mg nanoparticles synthesised after hydrogen cycling.

|                                          | Binding energy (eV) |        |            | Surface composition (at%) |       |       |       |
|------------------------------------------|---------------------|--------|------------|---------------------------|-------|-------|-------|
|                                          | Li1s                | Mg1s   | Mg2p       | Li1s                      | Mg2p  | C1s   | O1s   |
| Ball milled MgH <sub>2</sub>             | -                   | 1304.0 | 50.1, 51.4 | -                         | 46.85 | 8.86  | 34.13 |
| MgLi <sub>4.6</sub> Napht <sub>0.5</sub> | 55.2                | 1303.5 | 49.4       | 31.21                     | 5.04  | 19.58 | 44.17 |
| MgLi <sub>9.2</sub> Napht <sub>0.5</sub> | 55.2                | 1303.6 | 49.6       | 34.75                     | 0.95  | 19.47 | 44.83 |
| MgLi <sub>4.6</sub> Napht <sub>4.6</sub> | 55.1                | 1303.4 | 49.3       | 36.17                     | 1.14  | 17.18 | 45.50 |
| MgLi <sub>9.2</sub> Napht <sub>4.6</sub> | 55.2                | -      | 49.2       | 35.97                     | 0.77  | 18.83 | 43.80 |

XPS analysis of ball-milled MgH<sub>2</sub> displays a Mg2p peak at 51.4 eV attributed to the formation MgO or Mg(OH)<sub>x</sub>, and a Mg2p peak at 50.1 eV and Mg1s peak at 1304 eV attributed to metallic magnesium (Table s1).<sup>1</sup> In addition to the Mg1s peak corresponding to magnesium metallic, the nanoparticles synthesised and cycled display only one Mg2p peak also corresponding to metallic magnesium (Table S1).

XPS analysis also reveals a Li 1s peak at 55.2 eV for the nanoparticles synthesised and cycled (Fig. S12). This peak can be attributed to  $\text{Li}_2\text{CO}_3$  and may result from a partial surface contamination of the materials with  $\text{CO}_2$  upon transfer in air to the XPS instrument.<sup>2</sup>

Additional determination of surface composition showed that the surface nanoparticles synthesised was mainly composed of Li, Mg, O and C. The O and C content of the surface may be due to a partial oxidation/contamination of the surface upon transfer of the materials in air to the instrument and the thickness of this surface oxide/contamination may have influenced the detection of metallic magnesium.

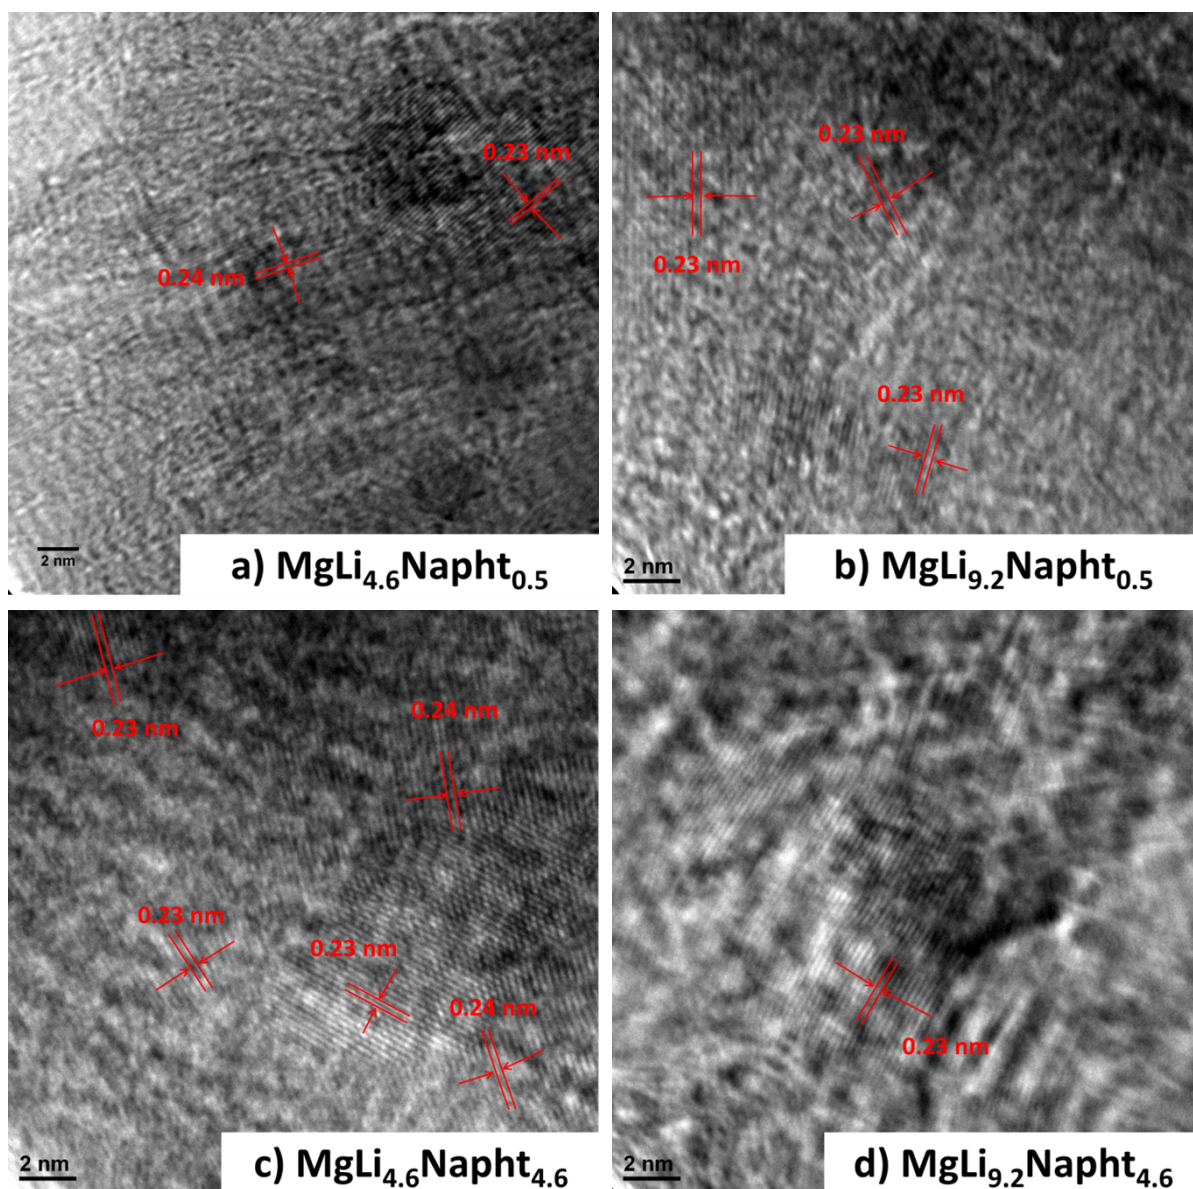

**Fig. S10:** HRTEM of the Mg nanoparticles after cycling.

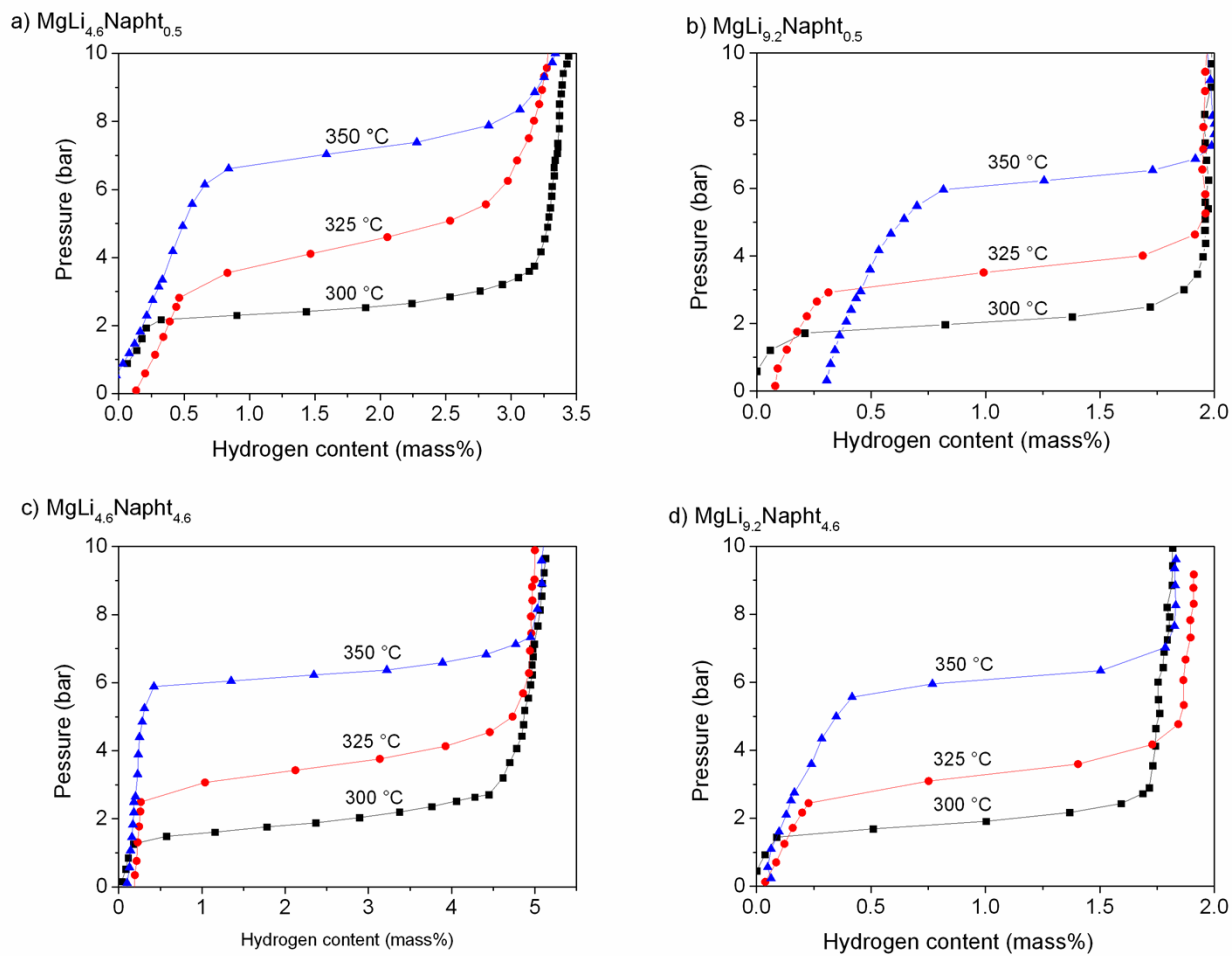

**Fig. S11:** PCI corresponding to the absorption of hydrogen within the Mg nanoparticles synthesised.

## Ball-milled Mg

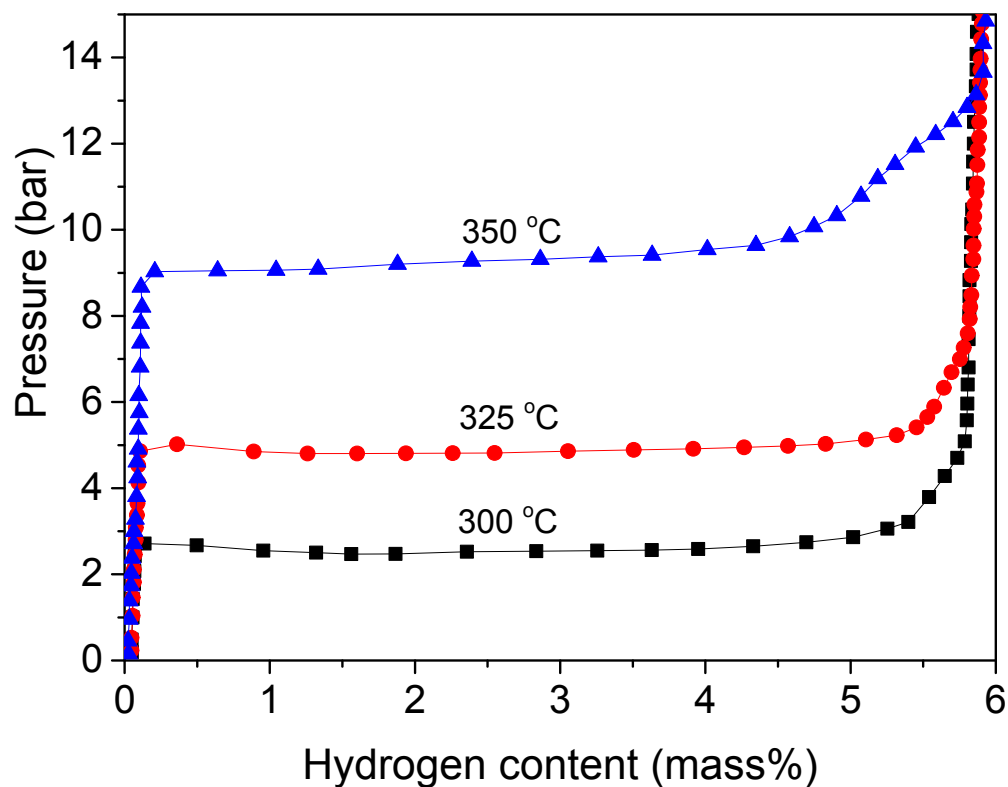

**Fig. S12:** PCI corresponding to the absorption of hydrogen with ball-milled MgH<sub>2</sub>.

1. O. Friedrichs, J. C. Sanchez-Lopez, C. Lopez-Cartes, M. Dornheim, T. Klassen, R. Bormann and A. Fernandez, *Appl. Surf. Sci.*, 2006, **252**, 2334-2345.
2. E. Nasybulin, W. Xu, M. H. Engelhard, Z. Nie, S. D. Burton, L. Cosimbescu, M. E. Gross and J.-G. Zhang, *J. Phys. Chem. C*, 2013, **117**, 2635-2645.
